# Supplementary material for: Evaluation of Ozone and its Precursors using the Multi-Scale Infrastructure for Chemistry and Aerosols Version 0 (MUSICAv0) during the Michigan-Ontario Ozone Source Experiment (MOOSE)
Source: Copernicus journal article supplement (doi:10.5194/egusphere-2025-228), 2025-02-14
Supplement: Supplementary file [file egusphere-2025-228-AC1-supplement.pdf]

## Response to Reviewer #1:

We would like to thank the reviewer for their careful and thorough reading of this manuscript and for the thoughtful and constructive comments and suggestions, which will help improve the overall quality of this manuscript. Our responses are denoted in **red**.

### General Comments:

The manuscript analyzes the distribution of ozone and some of its precursors over the Southeast Michigan (SEMI) region during summer 2021 based on model simulations with MUSICAv0 and observations from the MOOSE field campaign. The authors discuss the impact of grid resolution and diurnal cycle of anthropogenic NO emissions and show that night-time ozone is mostly improved by applying diurnal cycles for NO emissions, while grid resolution is found to have more impact on ozone precursors. The study also shows that using a good conceptualization of grid resolution within MUSICAv0, with finer resolution could lead to more efficient computational costs, which could be beneficial for other local-scale studies including in other regions.

The paper shows the interesting potential of using global models with zooming capabilities like MUSICAv0 to investigate air pollution characteristics even at specific small regions like SEMI. Overall, the paper is well structured and easy to read. However, the analysis and discussion sections are in some cases rather short and could be further improved in order to better identify the processes controlling summertime ozone in different parts of the SEMI region.

I recommend the manuscript to be accepted for publication after addressing the following comments and suggestions:

**Response: We thank Reviewer #1 for their careful observations, and appreciate their feedback and recommendations for improving the manuscript. We have carefully gone through all of your comments, and have addressed them below and in the main text.**

**Section 2.1.1:** Initial conditions are considered from a restart file based on MOZART-TS1. Which initial conditions are considered for the additional species in TS2 not included in TS1?

**Response:** We thank the reviewer for their observation. We have added a sentence addressing the usage of the initial condition file with TS1 for TS2 simulations in Section 2.1.1: “Although the initial condition file was based on MOZART-TS1 chemistry and the additional species in MOZART-TS2 were initiated from zero, the majority of these species are short-lived and equilibrate quickly within the one-month spin-up period.”

**Section 2.1.3:**

- Anthropogenic emissions are considered from CAMS\_GLOB\_ANTv5.1. A recent study from Soulie et al. (2024, ESSD) shows significant differences in the estimated emissions between CAMS\_GLOB\_ANTv5.1 and the EPA inventory in USA. In particular, EPA exhibits higher NMVOCs but lower NO<sub>x</sub> and SO<sub>2</sub> emissions. Can the authors comment on the potential impact of such uncertainties in emissions on the model results?

**Response:** Yes, we acknowledge the discrepancies between CAMS\_GLOB\_ANTv5.1 and the US EPA’s National Emission Inventory (NEI) described in Soulie et al. (2024). The differences in the emissions, especially the high NMVOCs and low NO<sub>x</sub> and SO<sub>2</sub>, in NEI compared to CAMS definitely has the potential to introduce uncertainties in the model results because emissions directly influence atmospheric chemistry and pollutant concentrations. Increased availability of NMVOCs could lead to increased O<sub>3</sub> production, especially in VOC-limited regimes (i.e., more urban areas; O<sub>3</sub> decreases with increase in NO<sub>x</sub> and increases with increase in VOC) and potentially alter the oxidizing capacity of the atmosphere. On the other hand, in NO<sub>x</sub>-limited regimes (i.e., more rural areas; O<sub>3</sub> increases with increases in NO<sub>x</sub> and changes very little with changes in VOC), the lower availability of NO<sub>x</sub> could reduce O<sub>3</sub> concentrations in the model. While these uncertainties reflect broader challenges pertaining to emission inventories such as spatial distribution and sectoral estimates, our study uses CAMS for consistency with other global studies, and explores the impact of relative changes such as adding diurnal variation of emissions. Future work should include the use of regional inventories, such as NEI, or inventories derived from inverse modeling. In addition, the lower emissions for NO<sub>x</sub> and SO<sub>2</sub> could also alter secondary

aerosol formation (e.g., lower NO<sub>x</sub> could decrease nitrate aerosol formation). Although this is a non-negligible issue, it is out of the scope of this study and should be addressed in future work.

We included a sentence commenting on future considerations in Section 5 as so: “Future work should also take into consideration the use of a more updated version of the CAMS-GLOB-ANT emissions, as well as the diurnal variation profiles of CAMS-GLOB-TEMPO (Guevara et al., 2021; Soulie et al., 2024), or more regional emission inventories such as the National Emission Inventory (NEI) from the US EPA.”

- It is not clear how soil NO<sub>x</sub> emissions are considered for the simulations.

Response: Global soil NO<sub>x</sub> emissions are based on the natural emissions of NO as described in Emmons et al. (2020). This is now mentioned in Section 2.1.3 as so: “Other emissions, from soil, lightning, volcanoes and oceans, are described in Emmons et al. (2020).”

- The authors include calculated NO emissions from agriculture waste burning (AWB) in Table S1, but it is not clear if emissions from this sector are considered or not. This could lead to double counting of emissions with QFED, although the contribution of NO AWB emissions seems to be minor compared to other sectors.

Response: CAMS anthropogenic emissions from all available NO sectors are considered when applying the diurnal cycle, where we’ve used a sector-based and country-specific temporal profile. There is a possibility that agricultural waste burning (AWB) emissions could be double counted in the emissions, as QFED uses satellite observations of the fire radiative power (i.e., rate of radiative energy emitted by an active fire) to estimate global gridded fire emissions, but for our region of study, this impact is minimal. Regardless, we have added a footnote in Table S1 of the Supplemental Information to note this uncertainty (see below).

80 **Table S1: Total anthropogenic nitric oxide (NO) emissions from the CAMSv5.1 in Michigan and Southeast Michigan, and their ratio**  
 81 **from various sectors\*.**

|                  | MICH [kt] | SEMI [kt] | SEMI/MICH |
|------------------|-----------|-----------|-----------|
| AGS              | 0.46      | 0.04      | 9.0%      |
| AWB <sup>1</sup> | 0.10      | 0.01      | 10.8%     |
| ENE              | 9.44      | 2.86      | 30.3%     |
| RES              | 1.03      | 0.48      | 47.1%     |
| TNR              | 1.99      | 0.36      | 18.1%     |
| TRO              | 15.13     | 3.50      | 23.2%     |

\*AGS = Agriculture Soils; AWB = Agriculture Waste Burning; ENE = Power Generation; RES = Residential; TNR = Off-Road Transportation; TRO = Road Transportation  
<sup>1</sup>It is possible that AWB emissions could be double counted via biomass burning emissions from QFED (QuickFire Emissions Dataset), where the fire radiative power obtained from the satellite is used to estimate the global gridded fire emissions (Darmanov and da Silva, 2015). Although it has been found that AWB can increase fire emissions over regions, in Southeast Michigan this contribution is minimal.

93 **Section 2.1.4:**

94 - Can the authors comment why only NO diurnal distribution is considered, while diurnal distribution  
 95 of other species like VOCs or SO2 could also impact the model results?

96 **Response:** We acknowledge that the diurnal distribution of VOCs and SO2 could impact model results,  
 97 especially for O3 chemistry. In our study, we focus on applying the diurnal cycle for anthropogenic NO  
 98 emissions due to its dominant role in controlling tropospheric O3 and titration processes, which are highly  
 99 sensitive in areas dominated by industrial and transportation-based activities, like SEMI. We recognize  
 100 that applying diurnal variation for VOCs and SO2 could also affect O3 production as they can be  
 101 temperature-driven (e.g., biogenic VOCs) and based on industrial activity. Future work will incorporate  
 102 temporal profiles for all available anthropogenic emissions, as they would help refine model results and  
 103 further assess the impact on other critical air pollutants.

104 We have added text to Section 2.1.4: “While emissions of other anthropogenic compounds, such as VOCs,  
105 do have diurnal variations, we have only implemented the diurnal variation for NO emissions in this work,  
106 due to its dominant role in controlling tropospheric O3 and titration processes.”

107  
108 - Including a figure showing the diurnal distribution of NO emissions from different sectors, as used in  
109 the simulation is a useful information.

110 Response: We have included a figure of the diurnal profiles for each sector in Fig. S2 in the supplemental  
111 information of the manuscript and reference it in Section 2.1.4.

112

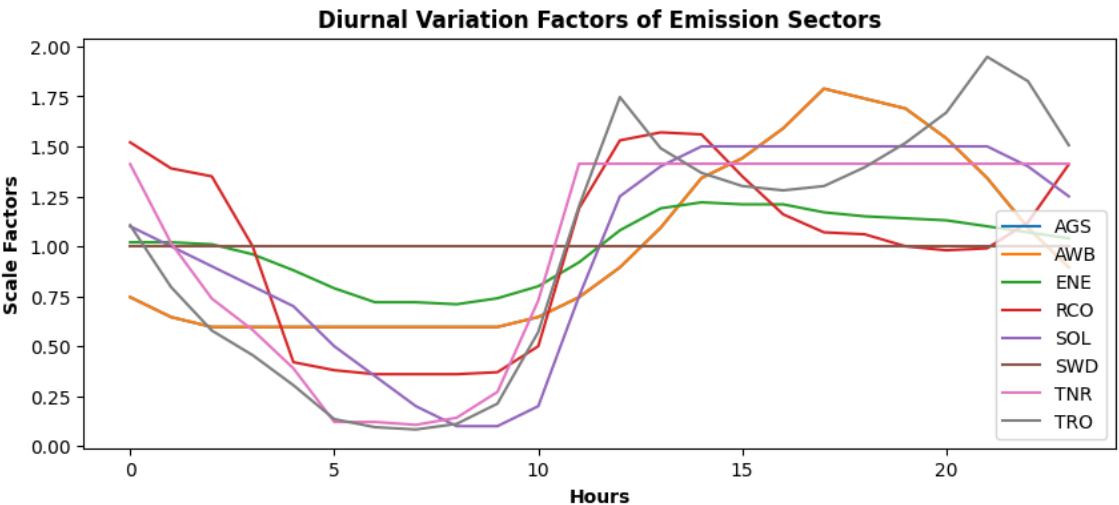

113  
114 **Figure S2: The diurnal variation scale factors applied to NO emissions for each anthropogenic emission sector used**  
115 **in the simulations.**

116  
117 **Section 3.1:**

118 - This section is rather short and doesn't fully cover the model's ability to capture meteorological  
119 features in the considered region. In addition to the model evaluation, this section is also expected to  
120 contain a description of the meteorological situation that characterized the SEMI/MI region during  
121 the campaign period. This section can also be significantly improved by considering other  
122 meteorological variables (e.g. wind speed/direction), other networks or datasets (e.g. reanalysis).

Response: We have expanded this section in the main text to elaborate further on the campaign period and the presented figure. We have also included a time series comparison of the AML wind speeds and wind directions to better support this section.

Expanded Text: “SEMI is a region that faces unique air quality challenges due to large industrial and automotive activity, dense population, and geographic factors. SEMI has a diverse terrain, ranging from highly urbanized areas, such as the city of Detroit, expansive agricultural lands in more remote areas, and forests surrounded by both inland and coastal lakes. The region consists of a relatively flat terrain, with a humid continental climate. Additionally, large air masses of humidity can be transported into the region from the Great Lakes (i.e., Lake Huron and Lake Erie) through the lake effect winds (Scott and Huff, 1996). A time series along the AML track of meteorological values – temperature, relative humidity, planetary boundary layer height, cloud total, wind speed, and wind direction – from the models (and observations for temperature and relative humidity) are shown in **Fig. 3**. During the campaign period in the summer of 2021, temperatures reached up to approximately 305 K and relative humidity to almost 100%. The planetary boundary layer reached more than 2500 m on most days, while cloud total was relatively varied. Modeled wind speeds follow the trend for the campaign period quite well, but are comparatively high compared to the observations, while wind directions perform generally well except on some specific days. The AML track covered a large part of the SEMI region, making its way through both very urban and rural areas. Meteorological parameters, such as temperature, are highly impacted by urbanization through the reductions in vegetated land cover and increases in energy consumption (Wang et al., 2021). Urbanization can lead to higher temperatures, and thus increasing O<sub>3</sub> production. In the simulations presented here, meteorological parameters (i.e., temperature and horizontal winds) are nudged towards reanalysis data to obtain a more realistic depiction of reality in the coarser resolution regions, leaving the regional refinement area to freely run, as the resolution of the refined area is finer than the resolution of the reanalysis dataset that is being used. Regional refinement grids, with high horizontal resolution, are capable of resolving areas with large geographical differences (Jo et al., 2023). Meteorological fields in these simulations are generally consistent indicating that meteorology is performing similarly, even with the changes in horizontal resolution. Although temperatures, relative

151 humidity, and planetary boundary layer height remain consistent among all the simulations, cloud total  
152 varies between the simulations, which can significantly impact photochemical production.”  
153  
154 Updated Figure:

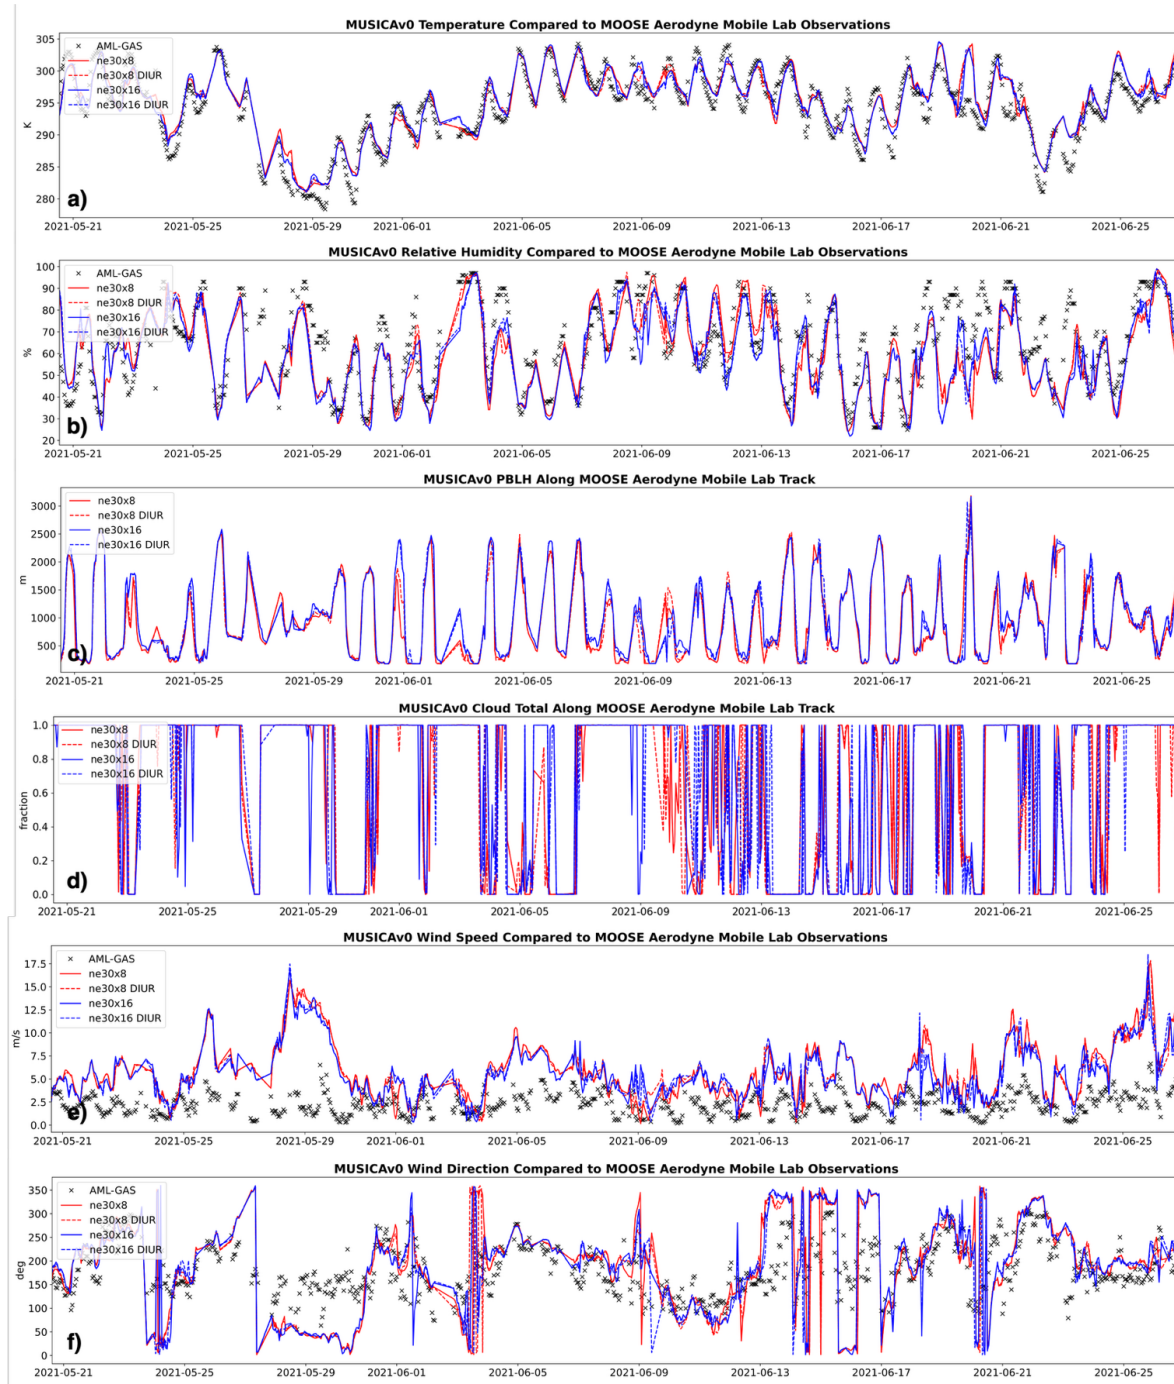

**Figure 3: Time series of (a) temperature, (b) relative humidity, (c) planetary boundary layer height, (d) cloud total, (e) wind speed, and (f) wind direction along the Aerodyne Mobile Laboratory (AML) track. Measurements of temperature and relative humidity were available and displayed as black x's in Fig. 3a and 3b. The model results are shown in red (ne30x8) and blue (ne30x16) corresponding to horizontal resolutions. The dashed lines represent model simulation results when adding the diurnal cycle for nitric oxide anthropogenic emissions, color-coded to their respective horizontal resolution.**



161  
162  
163  
164  
165  
166  
167  
168

**Section 3.2:**

- The authors could elaborate a bit more the discussion on the reasons behind the diurnal changes in the model bias and link with results in Sect. 4. For this, a map showing location of the stations could be very useful.

Response: A map that includes the stationary site locations for this evaluation can be found in Fig. 2 of the manuscript. A stronger link has been made between Sec. 3 and 4 to better enhance the discussion.

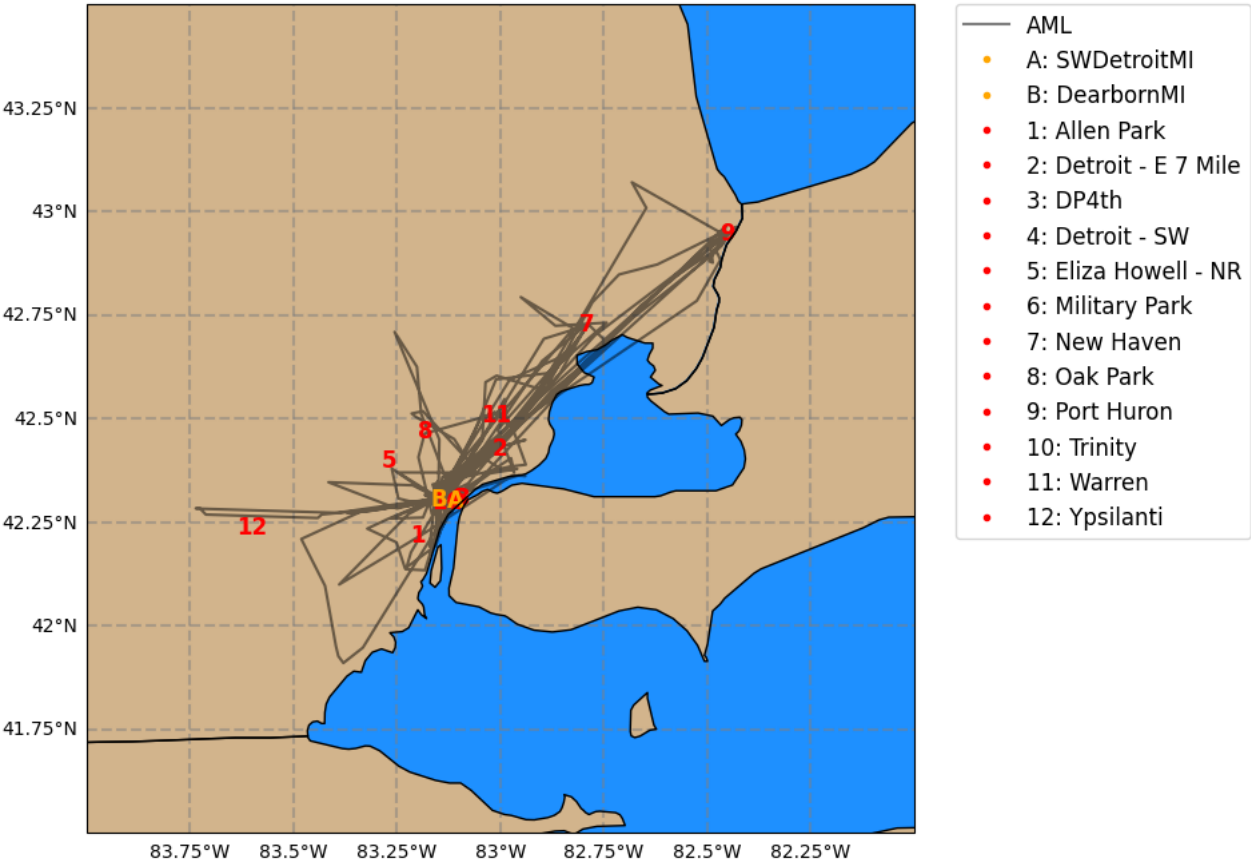

169  
170  
171  
172  
173  
174

**Figure 2: Location of observations from Phase I (24 May to 30 June 2021) of the Michigan-Ontario Ozone Source Experiment (MOOSE) used in this study. The gray line shows the track of the Aerodyne Mobile Laboratory across Southeast Michigan. Stationary sites from the Michigan Department of Environment, Great Lakes, and Energy (MI EGLE) are shown as the red numbers (1-12), and the Pandora monitoring sites are shown as the yellow letters (A-B).**

These linkages are reflected in Section 4 as so:

- “This difference results in an improvement for the ne30x16 simulations based on the findings from in Fig. 4, where peak O<sub>3</sub> performed best in the finer resolution simulations when compared to the surface sites.”
- “These findings are directly supported by **Fig. 3**, where although temperatures between the simulations are not significantly different, there are changes in cloud totals and winds that could impact solar radiation and thus the isoprene emissions. The differences in temperature between the resolutions are also illustrated in the maps in **Fig. S16-S31** in the SI.”

- The night-time NO<sub>2</sub>, in particular between 00 and 05 AM, although improved, remain high and the morning peak is less visible when NO diurnal cycle is applied. The authors should discuss the impact of potential uncertainties in the considered diurnal cycle, including the fact that this was applied only for NO.

Response: We thank the reviewer for their insightful observation regarding the nighttime NO<sub>2</sub> concentrations and the less prominent morning peak when the diurnal cycle for anthropogenic NO emissions is applied in the model. We acknowledge the potential uncertainties in the presented diurnal cycle and have expanded our discussion to take this into account.

- Possible causes for the high nighttime NO<sub>2</sub> concentrations include an overestimation of nighttime NO emissions. While the temporal profile applied to NO scales the anthropogenic emissions, some emission sectors (i.e., ENE, AWB; see temporal profile figure) have flatter temporal cycles that could lead to the sustained concentrations of NO<sub>2</sub> via the reaction of NO and O<sub>3</sub>. Nighttime NO<sub>2</sub> can also accumulate due to reduced O<sub>3</sub> titration, as well as due to a shallow nighttime boundary layer that can trap NO<sub>x</sub> concentrations.
- The less prominent peak could be due to the temporal profile application to anthropogenic NO emissions, as the morning rush may be too gradual, so the NO<sub>2</sub> peak appears more delayed than the observed values. In addition, the morning VOC emissions from transportation-related activities could further enhance the NO-to-NO<sub>2</sub> conversion, but since VOC diurnal cycles are not included, this feature could be underrepresented.

We have added a few sentences stating this uncertainty in Section 5 of the main text: “In addition, we acknowledge that apart from applying a diurnal cycle for anthropogenic NO emissions, the evolution of the PBL can also play a significant role in the formation of O<sub>3</sub> and NO<sub>x</sub>. In the daytime, a rising PBL can mix surface NO<sub>x</sub> and VOCs upwards, reducing O<sub>3</sub> concentrations near the surface, while in the nighttime, a shallower PBL can trap emissions near the surface leading to higher NO<sub>x</sub> titration. Uncertainties associated with the PBL could lead to underpredictions of NO<sub>2</sub> in the model and misrepresentations of O<sub>3</sub> peaks.”

### Section 3.3:

- The authors relate the differences in simulated isoprene (and hence HCHO?) to potential changes in meteorological field leading to changes in calculated BVOCs. Although this could be true, no results (i.e. changes in meteorology) are provided to assess this especially in the discussion in Sect. 3.1.

Response: Thank you for pointing out this discrepancy between the sections 3.1 and 3.3. As mentioned in an earlier part of this review, some necessary corrections and additions to section 3.1 have been made. Based on this, we have added some further explanation on what else could be impacting simulated isoprene. We have added discussion of how the biogenic emissions could be impacted by changes in cloud totals between the simulations.

This new addition to section 3.3 is: “Although temperatures are not greatly affected by grid resolution, as was seen in **Fig. 3**, cloud totals are different in the two resolutions, which can impact the amount of solar radiation reaching the surface. Clouds in the model can be impacted by several changes, such as changes in aerosols, which is out of the scope of this study, or related to changes in meteorology (e.g., winds). Yan et al. (2023) demonstrated that aerosols are able to impact precursor accumulation and photolysis (e.g., isoprene), where tropospheric chemical loss is enhanced due to photolysis and NO<sub>x</sub> accumulation. Cheng et al. (2022) also found that changing clouds in chemical transport models can impact photochemical reaction rates and BVOCs. Future work on evaluating model grid resolution and diurnal cycle impacts on O<sub>3</sub> formation should look more closely into aerosol-cloud interactions and how they impact photochemical production in SEMI.”

231 - Similarly, the discrepancies in other species (hydrocarbons and aromatics) is explained by  
232 misrepresentation of their anthropogenic sources in the CAMS inventory. The authors can assess such  
233 uncertainties in the considered emissions by comparisons with EPA emissions in SEMI.

234 **Response:** We have made a quick comparison of CAMSv5.1 emissions with HTAP\_v3.1 mosaic, which  
235 includes emissions from the US National Emission Inventory (NEI) (Crippa et al., 2023). Because  
236 HTAP\_v3.1 is only available up until 2020, we have compared with CAMSv5.1 for 2020 to illustrate the  
237 misrepresentation of emissions based on the emission inventory without year-to-year discrepancies. We  
238 have also included emissions for 2021 from CAMSv5.1 to show the differences between years. The  
239 emission totals shown in this table are representative of summertime emissions (June, July, August) for a  
240 domain over the state of Michigan (longitude: 273°W to 278°W; latitude: 41.5°N to 46°N). The  
241 comparison of CAMSv5.1 to HTAP\_v3.1 shows large differences, especially when comparing the energy,  
242 fugitives, solvents, road transport, and residential sectors. NEI is more regionally representative of the  
243 United States, so taking these differences into account would provide different results in the model  
244 simulations.

245

246

| Naming Convention |                            | Emission (in kt) |                 |                  |
|-------------------|----------------------------|------------------|-----------------|------------------|
| CAMS              | HTAP                       | CAMSv5.1 (2021)  | CAMSv5.1 (2020) | HTAP_v3.1 (2020) |
| ene               | Energy                     | 5.223            | 5.254           | 0.327            |
| ind               | Industry                   | 7.683            | 7.715           | 4.484            |
| fef               | Fugitives                  | 9.557            | 9.651           | 7.241            |
| slv               | Solvents                   | 15.548           | 15.529          | 29.011           |
| tro               | Road Transport             | 22.294           | 23.23           | 9.197            |
| tnr               | Other Ground Transport     | 0.365            | 0.39            | 1.042            |
| res               | Residential                | 1.856            | 1.887           | 12.002           |
| swd               | Waste                      | 0.004            | 0.004           | 1.672            |
| awb               | Agricultural Waste Burning | 1.007            | 1.005           | 0.102            |
| agl               | Agriculture Livestock      | 1.898            | 1.889           | 2.062            |
| -                 | Agriculture Crops          | -                | -               | 3.274            |
| shp               | International Shipping     | 0.025            | 0.025           | 0                |
|                   | Domestic Shipping          |                  |                 | 0.023            |
| SUM               |                            | 65.46            | 66.579          | 70.437           |

247  
248  
249  
250  
251  
252  
253  
254  
255  
256  
257  
258  
259  
260  
261  
262  
263  
264  
265  
266  
267  
268  
269  
270  
271  
272

Crippa, M., Guizzardi, D., Butler, T., Keating, T., Wu, R., Kaminski, J., Kuenen, J., Kurokawa, J., Chatani, S., Morikawa, T., Pouliot, G., Racine, J., Moran, M. D., Klimont, Z., Manseau, P. M., Mashayekhi, R., Henderson, B. H., Smith, S. J., Suchyta, H., Muntean, M., Solazzo, E., Banja, M., Schaaf, E., Pagani, F., Woo, J.-H., Kim, J., Monforti-Ferrario, F., Pisoni, E., Zhang, J., Niemi, D., Sassi, M., Ansari, T., and Foley, K.: The HTAP\_v3.1 emission mosaic: merging regional and global monthly emissions (2000–2018) to support air quality modelling and policies, *Earth Syst. Sci. Data*, 15, 2667–2694, doi:10.5194/essd-15-2667-2023, 2023.

**Section 3.4:**

- The discussion on evaluation of modeled HCHO columns contradicts the conclusion in Section 3.3: the authors say there is a combined effect of grid resolution and application NO diurnal cycle on HCHO (Line 429), whereas Sect. 3.3 states no obvious impact of NO on HCHO in the model (Line 383).

Response: This has been corrected in the main text as “The differences in grid resolution are seen more strongly than the inclusion of diurnal NO emissions for HCHO concentrations in **Fig. 6b**” in Section 3.3 and the removal of “Because HCHO does not have an obvious diurnal cycle and is different from NO<sub>2</sub>, performance for HCHO columns was much more dependent on the combined effect of grid resolution and the application of the diurnal cycle for anthropogenic NO” in Section 3.4.

- The section could be improved by discussing the link between the location of the stations/sites and the changes in HCHO (e.g. induced impact from isoprene emissions under different Nox-regimes).

Response: The locations are relatively close to each other, in urban/near-urban areas surrounded by industry. Additional text has been added in Section 3.4 as so:

- “We compare NO<sub>2</sub> and HCHO tropospheric columns from two Pandora spectrometers to the four MUSICA<sub>v0</sub> simulations. Both Pandora monitoring sites (SWDetroitMI and DearbornMI) were

located in an industrial and high-traffic setting, providing continuous observations in urban conditions and complementing the other observations”

- “The locations of the Pandora spectrometers are in highly industrialized, urban areas. The large model bias in HCHO columns could be an indication of missing emission sources in the area.”

- Like for other Sect. 3 subsections, it would be useful to include the location of the monitoring sites and link the results with those discussed in Sect. 4.

Response: A map that includes the Pandora sites shown for this evaluation can be found in Fig. 2 of the manuscript (can also be seen in the response for Section 3.2 above). A stronger link between Sec. 3 and 4 has been included in the main text. We’ve added a transition paragraph at the end of Section 3, which is shown below.

“Section 3 has evaluated the model simulations against four different types of observations obtained during MOOSE 2021. Taken together, the model evaluation shows (i) that refining the horizontal grid resolution in the model is the dominant factor leading to reductions in bias for peak O<sub>3</sub> concentrations, enhances NO<sub>2</sub> source region plumes, and better separates contrast between urban and suburban locations, such as Allen Park and Trinity St. Marks; (ii) that the diurnal cycle for anthropogenic NO emissions corrects the early morning biases in NO<sub>2</sub> and slightly impacts O<sub>3</sub>, while having small impacts on peak O<sub>3</sub> values; and (iii) the high biases in VOCs points to deficiencies in the emission inventory rather than grid resolution and temporal allocation. These findings motivate the more in-depth analysis described in Sec. 4, where we discuss resolution- and diurnal emission-driven changes governing O<sub>3</sub> production and loss across SEMI.”

### **Section 3.5:**

- Surface maps for winds, temperature and other meteorological parameters could be added to the Supplement to better understand the conditions during the analyzed days and times.

We included a table with detailed information of each GCAS raster on the flight days during MOOSE 2021 in the supplemental information as Table S8. We have also included maps during the GCAS flights of temperature and winds in the supplemental information as Figures S16-S31.

#### Section 4:

- The significant changes in isoprene emissions from MEGANv2.1 depending on the grid resolution is linked to the induced changes in meteorological parameters. This needs to be supported by maps of meteorological fields showing these changes.

Response: We thank the reviewer for this suggestion. We have incorporated a couple of sentences referencing Figures 3 and S16-S31, where different meteorological parameters are shown. We have noted some of the differences in relation to how they can impact isoprene. This is noted in Section 4 as: “These findings are directly supported by **Fig. 3**, where although temperatures between the simulations are not significantly different, there are changes in cloud totals and winds that could impact solar radiation and thus the isoprene emissions. The differences in temperature between the resolutions are also illustrated in the maps in **Fig. S16-S31** in the SI.”

- The link between Sect 4. and Sect 3. should be strengthened in either or both sections to better understand what drives the changes in the different sites, locations, etc.

Response: We have strengthened the link between sections 3 and 4 to better understand the changes driving O<sub>3</sub> chemistry in the region. We have added a transition paragraph at the end of Sec. 3, and an updated introduction for Sec. 4. We have also linked some of the findings in Sec 4. with what was found in Sec. 3. Line 612 is an example of this: “This difference results in an improvement for the ne30x16 simulations based on the findings in Fig. 4, where peak O<sub>3</sub> performed best in the finer resolution simulations when compared to the surface sites.”

- The discussion section is rather short and could/should be improved by strong arguments on e.g. what controls O<sub>3</sub> in different parts of the SEMI region and what mitigation strategies could be adopted to reduce the pollution.

Response: We have elaborated further on what is controlling O<sub>3</sub> in diverse locations across SEMI and incorporated some potential mitigation strategies, as well as future work using this modeling framework at the end of Sec. 4. The added contents in the updated manuscript are shown as follows.

“The findings of this study show that O<sub>3</sub> production in SEMI is strongly governed by the spatial distribution of emissions and different chemical regimes. The urban location analysis showed that Detroit, which is a major industrial hub in the region, was consistent with a VOC-limited regime, where in the daytime, O<sub>3</sub> concentrations are suppressed by high NO<sub>x</sub> titration, but can become sensitive to changes in VOCs during peak O<sub>3</sub> times. The suburban and remote location analysis (i.e., Allen Park and New Haven, respectively) showed that they were in a more NO<sub>x</sub>-limited regime, where higher BVOCs and lower NO<sub>x</sub> titration can lead to more efficient O<sub>3</sub> production. The spatial distribution is seen more clearly as we move towards finer resolutions indicating more realistic emissions.

In VOC-limited regimes, it is necessary to reduce emissions of VOCs as well as NO<sub>x</sub> to avoid increasing O<sub>3</sub> concentrations. Thus, targeting reductions in VOCs, such as those from the industrial sectors, is crucial. In NO<sub>x</sub>-limited regimes, where NO<sub>2</sub> drives O<sub>3</sub> production, reductions in transportation emissions and long-range transport would decrease O<sub>3</sub>. The improvement in model representation of NO<sub>2</sub> and in turn, O<sub>3</sub>, during rush hour times (**Fig. 4-5**) shows how emissions can be misrepresented in the models. It is necessary that future work considers incorporating higher resolution temporal profiles and regional emissions to better distinguish different O<sub>3</sub> processes. Future work should also explore the impacts of targeting the contribution of different emission scenarios in SEMI to demonstrate the impact of different regulatory decision-making.”
